# Supplementary material for: The Landscape of Microbial Composition and Associated Factors in Pancreatic Ductal Adenocarcinoma Using RNA-Seq Data
Source: Front Oncol. 2021 May 31;11:651350. doi: 10.3389/fonc.2021.651350 (PMC8202409; doi:10.3389/fonc.2021.651350)
Supplement: Supplementary Table 4 — The list of core microbiotas characterized in and across the four PDAC datasets. The bold words correspond to the genus shared by the five sets of core microbiotas. [file Table_4.xlsx]

## Sheet: core_across4datasets
TaxaName	SAMEA103909683	SAMEA103909684	SAMEA103909685	SAMEA103909686	SAMEA103909687	SAMEA103909688	SAMEA103909689	SAMEA103909690	SAMEA103909691	SAMEA103909692	SAMEA103909693	SAMEA103909694	SAMEA103909695	SAMEA103909696	SAMEA103909697	SAMEA103909698	SAMEA103909699	SAMEA103909700	SAMEA103909701	SAMEA103909702	SAMEA103909703	SAMEA103909704	SAMEA103909705	SAMEA103909706	SAMEA103909707	SAMEA103909708	SAMEA103909709	SAMEA103909710	SAMEA103909711	SAMEA103909712	SRR11124448	SRR11124449	SRR11124450	SRR11124451	SRR11124452	SRR11124453	SRR11124454	SRR11124455	SRR11124456	SRR11124457	SRR11124458	SRR11124459	SRR11124460	SRR11124461	SRR11124462	SRR11124463	SRR11124464	SRR11124465	SRR11124466
Desulfococcus	0	0	8.62106e-05	0	4.638e-05	0	0	0	0	0	0	0	0	0	0	0	0	0	0	0	0	0	0	0	0	0	0	0	0	0	0	0	0	0	0	0	0	0	0	0	0	0	0	0	0	0	0	0	0
Campylobacter	0.000227161	0	0.000193974	8.22797e-05	9.27601e-05	5.13163e-05	5.77151e-05	0.000104943	0.000150642	0	0	2.35366e-05	0.000116561	0.000355935	0.000163132	3.34784e-05	8.03923e-05	0	0	0.000949499	0	3.71802e-05	0	4.48803e-05	0	0	0	8.99099e-05	0	3.71609e-05	0	0.00054742	0.0217855	0.037922	0.00178465	0.000329598	0.000529942	0.00311994	0.000483247	0.00128287	0	0.00128493	0.000391236	0.00121544	0	0.00633863	0.000274198	1.88094e-05	0.000991408
Streptococcus	0.00624692	0.00189598	0.00950472	0.00255067	0.00459162	0.00313029	0.00657952	0.0102319	0.00395436	0.00435296	0.00167269	0.00209476	0.198232	0.00631785	0.00565525	0.00532307	0.00486374	0.016082	0.00401681	0.0156074	0.00214783	0.00791939	0.00830786	0.00249086	0.0021077	0.00191763	0.00358744	0.0011014	0.00375654	0.00115199	0.0183673	0.188723	0.168127	0.49366	0.0577037	0.272248	0.0263204	0.017333	0.127255	0.0635022	0.0319389	0.0292323	0.0760303	0.0305885	0.0286254	0.062308	0.0390732	0.0132888	0.104759
Deinococcus	0.000227161	0	0.000280184	0.000164559	0.00830203	0.000205265	8.65726e-05	0.00120684	0	0.000162727	0.000133815	0.00014122	0.0018067	0.000266951	0.000435019	0.000703047	0.000763727	0.000235634	0.000865159	0.000356062	0.000122733	0.000334622	0.00021523	0.00132397	5.14073e-05	0.000121754	0.000392377	8.99099e-05	0.000319706	0.0190078	0.000145773	0.000136855	0	7.92519e-05	0.00416419	0.00054933	0	0.000462214	0.00209407	0.00128287	0.00254381	0.000321234	0	0.000202573	0	9.802e-05	0.000274198	9.40468e-06	0.000660939
Pseudomonas	0.00927574	0.00692561	0.00993577	0.0698829	0.0219378	0.0223226	0.0181514	0.00834295	0.0192069	0.0263211	0.00735983	0.00374232	0.0124138	0.0170849	0.025503	0.00649481	0.0196157	0.00969044	0.0111853	0.0235594	0.00475591	0.0102246	0.0114072	0.0111079	0.00431821	0.00465711	0.0131726	0.0100699	0.0219398	0.00336306	0.00553936	0.0110853	0.00118399	0.00146616	0.0136823	0.0045045	0.00547606	0.00392882	0.0135309	0.0141116	0.0104579	0.0157404	0.00652061	0.0125595	0.0108021	0.00473763	0.00493556	0.00405812	0.00198282
Psychrobacter	0	0	0.000129316	0.000191986	0.00018552	0.000153949	0.000173145	0.000209886	0.000188303	4.06818e-05	0	0.000305976	3.88538e-05	8.89838e-05	0.000326264	0	0.000160785	0	0.000617971	0	6.13666e-05	0	4.30459e-05	0.000134641	5.14073e-05	0	0.000112108	0	0.00011989	0	0.000145773	0	0	3.96259e-05	0	0.000329598	0	0	0.00064433	0.000641437	0.000565291	0	0.000130412	0	0.000270051	0.00029406	0	9.40468e-06	0.000330469
Terrabacter	0	0	0	0	0	0	0	0	0	0	0	0	0	0	0	0	0	0	0	0	0	0	0	0	0	0	0	0	0	0	0	0	0	0	0	0	0	0	0	0	0	0	0	0	0	0	0	0	0
Kocuria	0.00499754	0.00184332	0.00144403	0.00466252	0.00153054	0.00225792	0.0013563	0.0011019	0.000866192	0.00203409	0.0035461	0.00185939	0.000971345	0.00106781	0.0021751	0.00220957	0.00136667	0.000913081	0.0042022	0.00065278	0.0009205	0.00182183	0.00094701	0.00150349	0.000436962	0.000426141	0.00044843	0.000247252	0.00491548	0.000315868	0.0058309	0.00752703	0.00260478	0.00150579	0.00475907	0.00889914	0.00706589	0.00843541	0.00789304	0.00256575	0.0245902	0.00256987	0.0174752	0.00557075	0.00891169	0.00264654	0.00562106	0.000263331	0.00330469
Enterobacter	0.000189301	0.000131666	4.31053e-05	0.000219413	9.27601e-05	0	0.000202003	0	0.00195835	0	0	0	5.82807e-05	0	0.000108755	3.34784e-05	0	0.000117817	0	5.93437e-05	0	0	0	8.97606e-05	0	0	0	0	0.000159853	1.85805e-05	0	0.000136855	0	0.000158504	0	0.000219732	0.000529942	0.000577768	0.000161082	0	0	0	0.000260824	0.000202573	0.000540103	0.0103248	0.000822594	0.00941409	0.00132188
Neisseria	0.000719343	0.00034233	0.00219837	0.000137133	0.00055656	0.000359214	0.00046172	0.000472243	0.000753211	0.0004475	0.000100361	0.000494269	0.00874211	0.000355935	0.0128331	0.000267827	0.000361765	0.00329887	0.000123594	0.000178031	0.000122733	0.000148721	0.00021523	0.000201961	0.000102815	6.08772e-05	0.000112108	6.74324e-05	0.000359669	7.43218e-05	0.000291545	0.00328452	0.0509117	0.00289269	0.00237954	0.0154911	0.000883236	0.00103998	0.00950387	0.010263	0.00141323	0.000321234	0.00469484	0.00202573	0.00108021	0.000816833	0.000274198	0.000239819	0.00132188
Bacteroides	0.00011358	5.26662e-05	0.000538816	2.74266e-05	0.00143778	5.13163e-05	0.00011543	0.000157414	0.000188303	8.13637e-05	0.000133815	4.70732e-05	0.000116561	0.000177968	0.00021751	3.34784e-05	0.000200981	5.89084e-05	6.17971e-05	0	0.000153417	0	4.30459e-05	2.24401e-05	7.71109e-05	3.04386e-05	0	6.74324e-05	7.99265e-05	0	0.000145773	0.00027371	0.00781435	0.00479474	0.00237954	0.00054933	0.000176647	0.00242662	0.0130477	0.00128287	0.000565291	0.000963701	0.000130412	0.000303859	0	0.00137228	0.000274198	9.40468e-06	0
Anaerococcus	0.00200659	5.26662e-05	0.00256477	0.000301692	0.00055656	0.000205265	0.000490578	0.000262357	0.000414266	8.13637e-05	6.69075e-05	2.35366e-05	9.71345e-05	0	0.000163132	0.00716438	0.000200981	0.000235634	6.17971e-05	0.000237375	0.000122733	0.000855146	4.30459e-05	0.00208693	0.000128518	0	0.000168161	8.99099e-05	0.000279743	0.000185805	0.00116618	0.00136855	0.000710395	0.000554763	0	0.00153812	0.00317965	0.00392882	0.00563789	0.000641437	0.00395704	0.000642467	0.00221701	0.00232959	0.000540103	0.000359407	0.00150809	0.00015988	0.00198282
Corynebacterium	0.00742059	0.00197498	0.0322428	0.00606127	0.00737443	0.0215528	0.00366491	0.00251863	0.0274545	0.00362068	0.00167269	0.0143809	0.00271977	0.00373732	0.00500272	0.00311349	0.00546668	0.00259197	0.00315165	0.00540027	0.00196373	0.00297442	0.015927	0.015192	0.00208199	0.00197851	0.00241031	0.00141608	0.0111497	0.00206243	0.0209913	0.00985357	0.00118399	0.00487399	0.0315289	0.0432872	0.018018	0.0166397	0.0299613	0.0160359	0.0203505	0.0112432	0.0221701	0.00850805	0.00810154	0.00369209	0.0149438	0.000611304	0.010575
Peptoniphilus	0.000492182	2.63331e-05	0.00116384	0.000219413	0.00018552	0.000102633	0.000288575	0.000157414	0.000150642	0.000406818	6.69075e-05	0	0.000116561	0.000177968	0.000163132	0.000100435	0.000401962	0.000176725	0.000308985	0.000237375	0.0001841	0.00304878	0.00021523	0.000201961	0.000102815	0.000121754	0	8.99099e-05	3.99632e-05	7.43218e-05	0.00058309	0.000136855	0	7.92519e-05	0.00237954	0.000219732	0.00158983	0.000231107	0.00612113	0.00962155	0.000282646	0.000963701	0.000782473	0.000202573	0	0.00019604	0.000137099	0	0
Aeromonas	3.78601e-05	2.63331e-05	0.000150869	8.22797e-05	0.00013914	0.00041053	0	0	0.000150642	8.13637e-05	0	2.35366e-05	1.94269e-05	0.000177968	0	0	0	0.000117817	0	0.00213637	0	0.000260262	8.60919e-05	2.24401e-05	0	0	0	2.24775e-05	3.99632e-05	1.85805e-05	0.000145773	0.00054742	0.000236798	0.00019813	0.00118977	0.000109866	0.000706589	0.000462214	0.000805412	0	0	0.000642467	0.000260824	0.000303859	0.000270051	3.26733e-05	0.000274198	0.000235117	0
Shigella	0	0	2.15527e-05	0	0	0	2.88575e-05	0	0.000225963	0	0	0	0	0	0	0	8.03923e-05	0	0	0	0	0	0	2.24401e-05	0	0	0	0	0	0	0	0	0	0	0	0	0	0.000577768	0	0	0	0	0	0	0	0.000326733	0.000274198	0.0048246	0
Veillonella	0.00011358	0	0.000344842	2.74266e-05	0.00032466	0.000205265	0.00034629	0.00136426	0.000188303	8.13637e-05	0.000167269	0.00014122	0.046372	0.000444919	0.000598151	0.000234349	0.000160785	0.00730464	0.000185391	0.000118687	0	0.000223081	0.000129138	0.000179521	0.000179925	3.04386e-05	0.000392377	8.99099e-05	0	0.000167224	0.000145773	0.00711646	0.00497277	0.0418846	0.00535396	0.000109866	0.00158983	0.000577768	0.000805412	0.00705581	0.000847937	0.00224863	0.000782473	0.00111415	0.00216041	0.00313664	0.000137099	0.00314587	0.00528751
Pediococcus	0	0	0.000129316	0	0	0	0	0	0	0	0	0	1.94269e-05	0	0	0	0	0	0.000123594	0	0	0	0	0	0	0	0	0	0	0	0	0	0	0	0	0.000109866	0	0	0	0	0	0	0	0	0	0	0	4.70234e-06	0
Prevotella	0.000870783	0.000157999	0.00597008	0.000246839	0.0004638	0.000153949	0.00046172	0.00115437	0.000263624	0.000528864	0.00026763	0.000188293	0.00553667	0.000533903	0	0.00020087	0.000442158	0.000147271	0.00111235	0.000178031	3.06833e-05	0.000260262	0.000645689	0.000134641	7.71109e-05	0.000304386	0.000224215	0.000134865	0.000559485	0.000297287	0.000728863	0.00766388	0.102297	0.144516	0.00237954	0.00054933	0.000706589	0.0149064	0.000966495	0.0609365	0.00395704	0.166399	0.00195618	0.00101286	0.000540103	0.0100634	0.00123389	3.29164e-05	0.000660939
Sphingomonas	0.00439178	0.00344964	0.00267253	0.00167302	0.031492	0.00359214	0.0023086	0.0260783	0.00320114	0.00504455	0.00183996	0.00249488	0.00254492	0.0282968	0.00570962	0.00261132	0.00369805	0.00217961	0.00525275	0.00278915	0.0014728	0.00312314	0.00210925	0.0030743	0.00115666	0.000943597	0.00207399	0.00128122	0.00359669	0.00117057	0.000145773	0.00027371	0.000236798	0.00019813	0.00654372	0.000659196	0.000529942	0.00115554	0.00064433	0.00705581	0.00819672	0.0430453	0.000521648	0.00101286	0.000810154	0.000163367	0.00123389	4.23211e-05	0.000991408
Mesorhizobium	0.00121152	0.000368664	0.000215527	0.000383972	0.00027828	0.000615795	0.000634866	0.00157414	0.000903853	0.00113909	0.00053526	0.000235366	0.000777076	0.000266951	0.000924415	0.000368262	0.000924512	0.000883626	0.00105055	0.00154294	0.000337516	0.00148721	0.000559597	0.000673204	0.000257036	0.000243509	0.000952915	0.000157342	0.00135875	3.71609e-05	0	0.000136855	0.000236798	0	0.000594884	0.000219732	0	0	0	0.00128287	0.000847937	0.000642467	0.000130412	0	0	3.26733e-05	0	9.40468e-06	0
Spirosoma	0.000681483	0.00163265	0.000819001	0.000219413	0.00120588	0.000615795	0.000750296	0.0040403	0.00195835	0.00126114	0.000167269	0.00353049	0.00165129	0.00694074	0.000761283	0.00117174	0.00052255	0.00250361	0.00383142	0.00700255	0.0003682	0.000483343	0.000602643	0.000785405	0.000205629	0.000152193	0.0130045	8.99099e-05	0.000319706	0.000278707	0.000145773	0.000136855	0	3.96259e-05	0.00237954	0.000988794	0.000176647	0.000115554	0.000161082	0.00256575	0.00141323	0.00546097	0.000130412	0.000202573	0.000270051	9.802e-05	0.000274198	2.82141e-05	0.000330469
Rothia	0.00223375	0.00034233	0.00301737	0.000466252	0.00143778	0.000307898	0.0011543	0.000524714	0.000790871	0.000650909	0.000200723	0.00021183	0.0150947	0.000533903	0.00304513	0.000502176	0.000241177	0.00262142	0.000432579	0.000712124	0.000245467	0.000408983	0.000516551	0.000448803	0.000462665	0.00021307	0.000336323	0.000202297	0.000359669	0.000185805	0.00131195	0.0117695	0.0189439	0.0164448	0.00654372	0.152604	0.0033563	0.00277328	0.0193299	0.0173188	0.00226116	0.0028911	0.00625978	0.00790033	0.0172833	0.0180357	0.00479846	0.00068184	0.0152016
Vibrio	3.78601e-05	0	0.000215527	0.000191986	4.638e-05	0	0.000144288	0.000104943	0.0016194	4.06818e-05	3.34538e-05	0.000353049	0.000155415	0.000177968	0	6.69568e-05	8.03923e-05	0.000117817	0.000123594	0	3.06833e-05	0	0	8.97606e-05	0	0	0.000168161	6.74324e-05	7.99265e-05	0	0	0.000136855	0.000473597	0.000118878	0.000594884	0	0	0.000115554	0.000322165	0	0	0.000321234	0	0	0	0.000130693	0.000137099	0.00564751	0
Gemella	0.00132511	0.000315997	0.000474158	0.000191986	0.0004638	0.000359214	0.00034629	0.000419771	0.000150642	0.000691591	3.34538e-05	0.000376586	0.000466246	0.000533903	0.000271887	0.000267827	0.00052255	0.00055963	0.000308985	0.000415406	0.000398883	0.000520523	0.000990056	0.000157081	0.000102815	0.000121754	0.000112108	0.000292207	0.000279743	0.000222965	0.00058309	0.00615848	0.0224959	0.0284118	0.00297442	0.0048341	0.0130719	0.00346661	0.00467139	0.00128287	0.000847937	0.000963701	0.00899844	0.00273473	0.00513097	0.00186238	0.000959693	4.70234e-05	0.00760079
Acidovorax	0.00170371	0.000684661	0.000625027	0.00145361	0.00222624	0.00179607	0.00152945	0.00167908	0.0016194	0.00252227	0.000602168	0.000776708	0.0010102	0.00195764	0.00233823	0.00133914	0.0010451	0.00147271	0.00123594	0.00255178	0.00135007	0.00141285	0.00129138	0.0118484	0.000359851	0.000943597	0.00140135	0.000561937	0.00175838	0.000445931	0.00058309	0.00109484	0.000236798	0.000158504	0.0124926	0.000439464	0.000706589	0.000808875	0.000483247	0.010263	0.00960995	0.00835207	0.000782473	0.000709004	0.00135026	0.000130693	0.000822594	1.4107e-05	0.000660939
Salmonella	3.78601e-05	2.63331e-05	0.000215527	0.000246839	0.00013914	0.000102633	0.00011543	5.24714e-05	0.00071555	4.06818e-05	0.000133815	0.00014122	9.71345e-05	0	0	6.69568e-05	0	0	6.17971e-05	0	0	0	4.30459e-05	0.000269282	2.57036e-05	0	0.000168161	4.49549e-05	3.99632e-05	3.71609e-05	0.000145773	0	0	0.000118878	0	0.000109866	0	0	0.000322165	0.00128287	0	0	0	0	0	0.00039208	0.00260488	0.02575	0.000330469
Klebsiella	0.00011358	0	0.000193974	0.000438825	0.00027828	0.000256581	0.000202003	0.000157414	0.000451926	0.000203409	0	0	0.000155415	0	0.000108755	3.34784e-05	4.01962e-05	2.94542e-05	0	0	0	0.000148721	4.30459e-05	0.000157081	0	0	0.000336323	4.49549e-05	3.99632e-05	0	0	0	0	3.96259e-05	0.000594884	0.000109866	0	0.000115554	0.000322165	0.00128287	0.000282646	0.000321234	0	0.000101286	0	0.00359407	0.0367425	0.129634	0.000660939
Actinomyces	0.000984364	0.000184332	0.0184491	0.000411398	0.000649321	0.000615795	0.00046172	0.0007346	0.000903853	0.000569546	0.000468353	0.00021183	0.0140457	0.000800854	0.000652529	0.000703047	0.00205	0.00164944	0.000556174	0.000534093	0.000153417	0.000669244	0.000559597	0.000987366	0.000822516	6.08772e-05	0.000336323	0.000247252	0.000799265	3.71609e-05	0.000145773	0.00109484	0.000236798	0.0010699	0.0130874	0.00153812	0.000176647	0.00115554	0.00193299	0.010263	0.00395704	0.0106007	0.00782473	0.00121544	0.00135026	0.000457427	0.000822594	3.29164e-05	0.000991408
Paenibacillus	0.000151441	2.63331e-05	2.15527e-05	8.22797e-05	4.638e-05	0.000769744	0.00011543	0.000104943	0.000150642	0.000244091	0.000635622	0	0	0	0.000108755	0.000167392	0.000281373	0.000913081	6.17971e-05	0.000178031	6.13666e-05	7.43605e-05	0	0.000561004	2.57036e-05	6.08772e-05	0.000168161	2.24775e-05	0.00011989	0	0.0016035	0.000136855	0	0.000277382	0	0.000659196	0.000529942	0.000346661	0.000805412	0	0.00113058	0.000963701	0.000782473	0.000607718	0.000270051	3.26733e-05	0.000137099	0.000103452	0
Burkholderia	0.000265021	0.000157999	0.000215527	0.000219413	0.00037104	0.00107764	0.00034629	0.000262357	0.00361541	8.13637e-05	3.34538e-05	7.06098e-05	0.000271977	0.000533903	0.000815661	0.000167392	0.000281373	0.000382905	6.17971e-05	0	0.0001841	0.000260262	0.00021523	0.000314162	0.000205629	6.08772e-05	5.60538e-05	6.74324e-05	0.000839228	0.000334448	0.00058309	0.00054742	0	0.000158504	0.00713861	0.00054933	0.000353294	0.000808875	0.000483247	0.00898012	0.00226116	0.00706714	0.000652061	0.000101286	0.00108021	0	0.000274198	0.000282141	0.000660939
Streptomyces	0.000946504	0.000131666	0.000301737	0.000411398	0.000973981	0.000102633	0.000923441	0.0007346	0.000564908	0.000895	0.000434899	0.000517805	0.000271977	0.000177968	0.000543774	0.000334784	0.000281373	0.000795264	0.000679768	0.000415406	0.000245467	0.000260262	0.000688735	0.000830285	0.000436962	0.000608772	0.000560538	0.000224775	0.000279743	0.000278707	0.000145773	0	0	0.000158504	0.0166568	0	0	0.000231107	0.000161082	0.0211674	0.00847937	0.0167041	0	0.000202573	0	6.53467e-05	0.000137099	0.000460829	0
Ralstonia	0.0815129	0.04079	0.0313807	0.0332959	0.0705904	0.0793863	0.0603122	0.0678455	0.0535909	0.113218	0.0309447	0.0282675	0.0383293	0.0864033	0.0764002	0.058989	0.0708658	0.0597626	0.088308	0.0753664	0.0442147	0.074472	0.080582	0.0470794	0.0324123	0.0354001	0.0650224	0.0266808	0.0774088	0.0335749	0.196647	0.182702	0.0843003	0.0380409	0.319453	0.115909	0.192899	0.190086	0.200226	0.365619	0.118146	0.287504	0.25952	0.32675	0.297056	0.124257	0.195503	0.0074391	0.211831
Flavobacterium	0.000605762	0.000105332	0.000107763	0.000740517	0.00037104	0.000667111	0.000288575	0.000314828	0.00421798	0.000406818	0.00110397	0	0.000233123	0.000355935	0.000435019	0.000267827	0.000482354	8.83626e-05	0.000247188	0.00065278	0	0.000223081	0.000258276	0.000673204	0.000154222	0.000304386	0.000224215	8.99099e-05	7.99265e-05	1.85805e-05	0.000291545	0.000684275	0.000236798	0.000594389	0	0.000219732	0.000529942	0.000346661	0.000322165	0	0.000282646	0	0.000260824	0.000101286	0.000270051	3.26733e-05	0.000411297	1.88094e-05	0
Nocardia	0.00011358	0	2.15527e-05	0	9.27601e-05	0.000205265	0	0	7.53211e-05	0	3.34538e-05	0.00120037	0.000291404	8.89838e-05	0.00021751	6.69568e-05	0.000160785	0	0	0	0	0	0.000129138	0.0129255	0.000128518	0	0	0	0	0	0.00466472	0.000410565	0	0	0	0	0	0.000231107	0	0	0	0.00128493	0.000391236	0.000101286	0	3.26733e-05	0	4.70234e-06	0
Haemophilus	0.00011358	0.000157999	0.00420277	0.000219413	0.00037104	0.000307898	0.000779153	0.000419771	0.000376605	0.000325455	0.000200723	7.06098e-05	0.0356484	0.000177968	0.00108755	0.000100435	0.000241177	0.00220907	0.000185391	0.000356062	0.000122733	0.000185901	0.000172184	8.97606e-05	0	0.000152193	0.000224215	6.74324e-05	0.000239779	7.43218e-05	0.000437318	0.00164226	0.0918778	0.0233397	0.000594884	0.0248297	0.000353294	0.000693321	0.00064433	0.010263	0.000282646	0.000963701	0.000521648	0.000506432	0	0.00382278	0.000685495	0.000489044	0.00495704
Chryseobacterium	0.000530042	0.000500329	0.00665977	0.00447053	0.00102036	0.0105198	0.000548293	0.0007346	0.00395436	0.00296977	0.00123779	0.011274	0.000174842	0.00106781	0.000163132	0.00164044	0.000482354	0.00465377	0.00111235	0.00065278	0.00027615	0.000632064	0.00124833	0.00271526	0.000385555	0.000304386	0.000392377	0.00026973	0.000399632	0.000130063	0.000145773	0.000410565	0.000236798	0.000435885	0	0.000769062	0.000176647	0.000231107	0.000483247	0.00192431	0.00113058	0.000321234	0.000130412	0	0	6.53467e-05	0.000274198	4.70234e-06	0.000660939
Finegoldia	7.57203e-05	0.000131666	0.000603474	0.000521105	0.00032466	0.000256581	0.000692581	0.000157414	0.000414266	0.000284773	0.000234176	0.00174171	0.00025255	0.000266951	0.000761283	0.000301306	0.000200981	0.000235634	0.000308985	0.000237375	0.000122733	0.000223081	0.000258276	0.000157081	0.000179925	0.000243509	0.000168161	6.74324e-05	0.000559485	0.000260126	0	0.00054742	0	0.000118878	0.000594884	0.000109866	0.00229641	0.00797319	0.00064433	0.0128287	0.000847937	0.000642467	0.000391236	0.000202573	0.000540103	0.000457427	0.000822594	4.70234e-06	0.000330469
Bacillus	0.0140083	0.00402897	0.00737101	0.00364773	0.00500904	0.00687638	0.00608894	0.00813307	0.0087749	0.00272568	0.0018065	0.00691976	0.00338028	0.0198434	0.00543774	0.00468698	0.0041804	0.00762864	0.0103819	0.0461694	0.00340585	0.00509369	0.00305626	0.00522855	0.00323866	0.00429185	0.0204596	0.00534964	0.0022779	0.00302861	0.00758017	0.00848501	0.00165759	0.00225868	0.00892326	0.00395517	0.0157216	0.156575	0.00853737	0.010263	0.0149802	0.0167041	0.00482525	0.0044566	0.00729139	0.00444357	0.129421	0.00179629	0.0042961
Clostridium	0.0011358	0.000210665	0.000711238	0.000301692	0.00106674	0.000461846	0.000548293	0.000787071	0.000866192	0.000691591	0.000301084	0.000305976	0.000310831	0.000444919	0.000598151	0.000133914	0.000361765	0.000500722	0.000432579	0.000712124	0.000429566	0.000334622	0.000860919	0.000381482	0.00028274	9.13159e-05	0.000504484	6.74324e-05	0.000679375	3.71609e-05	0.00116618	0.00150541	0.000473597	0.000990648	0.0172516	0.000988794	0.00141318	0.00219552	0.00112758	0.0173188	0.00876201	0.0118856	0.00169536	0.00141801	0.00189036	0.0518853	0.00315328	0.498951	0.00264375
Staphylococcus	0.323401	0.149914	0.118346	0.148844	0.29943	0.322112	0.261276	0.281142	0.221519	0.437736	0.132778	0.134465	0.224012	0.305659	0.340131	0.263107	0.323941	0.268681	0.405327	0.286214	0.168237	0.289709	0.278249	0.149092	0.115409	0.129242	0.261996	0.11486	0.322903	0.119751	0.279446	0.32421	0.218565	0.0642733	0.117787	0.182268	0.360714	0.295008	0.271102	0.010263	0.00819672	0.0212014	0.297731	0.387218	0.387524	0.147585	0.367151	0.0127198	0.511236
Cutibacterium	0.0153334	0.00484529	0.0209276	0.0101478	0.0241176	0.0166265	0.0110524	0.00776577	0.0433096	0.014442	0.00458317	0.0212536	0.00705197	0.0159281	0.0138662	0.0467693	0.0278559	0.0214721	0.0156965	0.0238562	0.00803903	0.165861	0.0428737	0.0201961	0.0151908	0.00955773	0.00992152	0.00552946	0.0418015	0.00745076	0.362974	0.153004	0.0362302	0.0289269	0.110054	0.10679	0.173291	0.209383	0.191044	0.130853	0.0517241	0.100867	0.206182	0.149093	0.137726	0.43926	0.108034	0.00438258	0.0601454
Mycobacterium	3.78601e-05	2.63331e-05	8.62106e-05	0.000109706	0.00032466	0.00195002	0.000692581	0	3.76605e-05	4.06818e-05	0.000133815	0.00014122	5.82807e-05	8.89838e-05	0.000108755	0.000133914	0.000321569	0.000265088	0.000370782	0	0	7.43605e-05	0	0	0	0	0	2.24775e-05	0.00011989	0	0	0.000410565	0.000236798	3.96259e-05	0	0	0.000176647	0.000231107	0	0	0.000282646	0.000321234	0	0.000202573	0	0.000130693	0	5.17258e-05	0
Bordetella	0	0	0	0	0.00013914	0.000102633	5.77151e-05	0	0.000263624	4.06818e-05	0	2.35366e-05	1.94269e-05	0	0	3.34784e-05	4.01962e-05	0	0	5.93437e-05	0	0	0	2.24401e-05	0	0	5.60538e-05	0	0	0	0	0	0	0	0.000594884	0.000109866	0	0	0.000322165	0.000641437	0.000282646	0.000321234	0	0	0	0	0	9.40468e-06	0
Micrococcus	0.012191	0.00118499	0.0357127	0.0157703	0.00783823	0.00338687	0.00404005	0.0018365	0.0390916	0.00349864	0.00120434	0.0256784	0.117572	0.00284748	0.00527461	0.00304653	0.00811962	0.00188507	0.00407861	0.00480684	0.00107392	0.00513087	0.0124403	0.0273545	0.00151651	0.000852281	0.00123318	0.000741756	0.00947129	0.00445931	0.0332362	0.00232654	0.000236798	0.000317007	0.010113	0.000988794	0.0775481	0.00392882	0.00306057	0.00577293	0.114471	0.0189528	0.00352113	0.00273473	0.00270051	0.00127426	0.00246778	8.46422e-05	0.00132188
Halomonas	0.000946504	0.00110599	0.00114229	0.000740517	0.00190158	0.00143686	0.000721438	0.0280197	0.00158174	0.00117977	0.000401445	0.00235366	0.000738222	0.0106781	0.000815661	0.00103783	0.000763727	0.00164944	0.000803362	0.00640912	0.0003682	0.00193337	0.00137747	0.00451047	0.00136229	0.000182632	0.00644619	0.000494504	0.000359669	0.000185805	0.00174927	0.00136855	0.000473597	0.000158504	0.00178465	0.00142826	0.00123653	0.0015022	0.000966495	0.00256575	0.00141323	0.00224863	0.00117371	0.000303859	0.00108021	0.00803764	0.000822594	0.000550174	0.000330469
Xanthomonas	0	2.63331e-05	2.15527e-05	8.22797e-05	0	0	0.000202003	0.000262357	3.76605e-05	0.0004475	0	0	5.82807e-05	8.89838e-05	5.43774e-05	0	0	2.94542e-05	0	5.93437e-05	3.06833e-05	0	0	6.73204e-05	5.14073e-05	0	0	8.99099e-05	7.99265e-05	0	0	0	0	0	0.000594884	0	0	0.000231107	0	0	0.00113058	0.000321234	0	0	0.000540103	0.000130693	0.000137099	0.000239819	0
Moraxella	0.0166963	0.00426596	0.104961	0.0657689	0.0217522	0.00585005	0.0494907	0.00456501	0.0278688	0.0183475	0.0113743	0.135359	0.0160466	0.00631785	0.0314301	0.00830264	0.00932551	0.0115461	0.00655049	0.0312741	0.00153417	0.00691553	0.00611252	0.111707	0.00323866	0.00560071	0.0043722	0.00227022	0.0523119	0.00767373	0.0100583	0.00465307	0.00142079	0.000832145	0.00892326	0.00252692	0.0508744	0.00381327	0.00596005	0.00384862	0.0975127	0.00706714	0.0277778	0.00486174	0.0237645	0.0034307	0.00260488	0.000239819	0.00231328
Acinetobacter	0.00488396	0.0102436	0.0238372	0.00397685	0.0223088	0.044953	0.0061178	0.00466995	0.0262494	0.00610227	0.0018065	0.00207122	0.00258378	0.0518776	0.0163132	0.00629394	0.00462256	0.0202645	0.0168088	0.00866417	0.0025774	0.00468471	0.0191985	0.00756233	0.00547487	0.00216114	0.00235426	0.00296703	0.00419614	0.00702341	0.00116618	0.00232654	0.000710395	0.000475511	0.0166568	0.00417491	0.00247306	0.00138664	0.00209407	0.0198845	0.211419	0.0160617	0.0010433	0.00354502	0.00378072	0.000424753	0.0143954	0.000921659	0.00495704
Lawsonella	0.000340741	0.000157999	0.000129316	0.000137133	9.27601e-05	0.000102633	0.000173145	0	0.000451926	0.000203409	3.34538e-05	7.06098e-05	5.82807e-05	0	0	0.000167392	0	0.000206179	0	0.000237375	0.000122733	0.000817965	0.000172184	6.73204e-05	5.14073e-05	0	0	6.74324e-05	0.000839228	0	0.00247813	0.0012317	0.000236798	0.000158504	0.000594884	0.00131839	0.00141318	0.000693321	0.0027384	0.000641437	0	0.000963701	0.00195618	0.0015193	0.00216041	0.000359407	0.000685495	7.05351e-05	0.00165235
Fusobacterium	0.00439178	5.26662e-05	0.000129316	0.000246839	0.00120588	0.000513163	0.000202003	0.000419771	0.000150642	0.000162727	0.000200723	0.000164756	0.013696	8.89838e-05	0.000326264	0.000100435	0.000321569	8.83626e-05	0.000123594	0.000415406	0.000122733	0.000223081	0.000344367	4.48803e-05	0.000257036	9.13159e-05	0.000112108	6.74324e-05	0.00483555	0.000148644	0.000291545	0.00191597	0.0677244	0.00463623	0.000594884	0.00054933	0.000883236	0.00127109	0.00161082	0.00320718	0.00197852	0.00160617	0.000521648	0.000810291	0.000270051	0.0198654	0.000548396	5.64281e-05	0.0042961
Escherichia	3.78601e-05	2.63331e-05	0.000258632	0.000383972	9.27601e-05	0.000461846	0.00106773	5.24714e-05	0.000414266	0.000203409	0	7.06098e-05	0.000116561	0	0	6.69568e-05	0.000361765	8.83626e-05	6.17971e-05	0.000237375	3.06833e-05	0	4.30459e-05	0.000291722	0.000231333	0	0	4.49549e-05	0	7.43218e-05	0	0.000684275	0.000473597	0.000158504	0.00178465	0.00054933	0.000353294	0.00219552	0.00306057	0	0.000282646	0	0.000391236	0.000405145	0	0.00137228	0.00534686	0.0343976	0.000330469
Mycoplasma	3.78601e-05	0	0.000237079	2.74266e-05	0.00018552	0.000205265	0	0.000104943	0.000112982	4.06818e-05	6.69075e-05	2.35366e-05	0.000116561	0.000177968	0	3.34784e-05	0.000120588	2.94542e-05	0	0	9.205e-05	7.43605e-05	0.000129138	8.97606e-05	0	0	0.000112108	0	0.000279743	0	0	0.00054742	0.000236798	7.92519e-05	0	0	0	0.000115554	0.000483247	0	0	0	0.000391236	0	0.000270051	0	0.000274198	6.58328e-05	0
Lactobacillus	0.00791277	0.000816327	0.0179103	0.00726804	0.00653959	0.00266845	0.00764725	0.0319551	0.00395436	0.00431227	0.00234176	0.00127098	0.00161243	0.00338138	0.00413268	0.0021761	0.00474315	0.00303378	0.00321345	0.00510355	0.00177963	0.00814247	0.00387413	0.00246842	0.00172214	0.00155237	0.00627803	0.00325923	0.00155857	0.00289855	0.00174927	0.00218968	0.000473597	0.00245681	0.00594884	0.00351571	0.00211977	0.00115554	0.00338273	0.00898012	0.00113058	0.0028911	0.00195618	0.00111415	0.00540103	0.00836437	0.00370167	0.00130255	0.000991408
[truncated: 517 more columns]
